# Supplementary material for: Yield of genetic association signals from genomes, exomes and imputation in the UK Biobank
Source: PubMed Central journal article supplement (PMC11549045; doi:10.1038/s41588-024-01930-4), 2024-09-25
Supplement: 41588_2024_1930_MOESM1_ESM.pdf [file 41588_2024_1930_MOESM1_ESM.pdf]

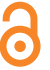

# **Yield of genetic association signals from genomes, exomes and imputation in the UK Biobank**

---

In the format provided by the  
authors and unedited

## Table of Contents

|                                                                       |           |
|-----------------------------------------------------------------------|-----------|
| <b>Supplementary Note</b> .....                                       | <b>2</b>  |
| Survey of coding variation .....                                      | 2         |
| <b>Supplementary Figure 1.</b> .....                                  | <b>3</b>  |
| <b>Supplementary Figure 2.</b> .....                                  | <b>4</b>  |
| <b>Supplementary Figure 3.</b> .....                                  | <b>5</b>  |
| <b>Supplementary Figure 4</b> .....                                   | <b>6</b>  |
| <b>Supplementary Figure 5.</b> .....                                  | <b>7</b>  |
| <b>Supplementary Figure 6.</b> .....                                  | <b>8</b>  |
| <b>Supplementary Figure 7.</b> .....                                  | <b>9</b>  |
| <b>Supplementary Figure 8.</b> .....                                  | <b>10</b> |
| <b>Supplementary Figure 9.</b> .....                                  | <b>11</b> |
| <b>Supplementary Figure 10.</b> .....                                 | <b>12</b> |
| <b>Supplementary Figure 11.</b> .....                                 | <b>13</b> |
| <b>Supplementary Figure 12.</b> .....                                 | <b>14</b> |
| <b>Supplementary Figure 13.</b> .....                                 | <b>15</b> |
| <b>Supplementary Table 1</b> .....                                    | <b>16</b> |
| <b>Supplementary Table 2</b> .....                                    | <b>16</b> |
| <b>Supplementary Table 3</b> .....                                    | <b>16</b> |
| <b>Supplementary Table 4</b> .....                                    | <b>18</b> |
| <b>Supplementary Table 5</b> .....                                    | <b>18</b> |
| <b>Supplementary Table 6</b> .....                                    | <b>19</b> |
| <b>Supplementary Table 7</b> .....                                    | <b>19</b> |
| <b>Supplementary Table 8</b> .....                                    | <b>19</b> |
| <b>Supplementary Data 1.</b> .....                                    | <b>20</b> |
| <b>Supplementary Data 2.</b> .....                                    | <b>20</b> |
| <b>Supplementary Data 3.</b> .....                                    | <b>20</b> |
| <b>List of Investigators from the Regeneron Genetics Center</b> ..... | <b>20</b> |
| <b>References</b> .....                                               | <b>21</b> |

## Supplementary Note

### Survey of coding variation

Before proceeding to genetic association analyses, we compared the number of coding variants detected by the WGS and WES+IMP approaches. We annotated variants by functional consequence with the ENSEMBL Variant Effect Predictor (McLaren et al., 2016) using the ENSEMBL 100 canonical transcript definitions (Cunningham et al., 2022). As expected, both approaches resulted in very similar numbers of coding variants per individual (WGS median: 19,905, IQR: 239; WES+IMP median: 19,948, IQR: 245). For both datasets, 48% of observed variants were singletons. For WGS, 75.3% variants are present in less than 5 individuals and similarly 74.7% of WES+IMP variants are present in less than 5 individuals. Overall, coding variants were distributed across 19,377 genes in the WGS data, and across 18,446 genes in the WES+IMP data set (among the genes in WES+IMP dataset, variants in 347 genes were outside the exome target regions and detected only through arrays and imputation).

The total number of coding variants captured by each approach was very similar (WGS 6,732,108 variants; WES+IMP 6,761,880 variants) with 6,544,263 observed in both WGS and WES+IMP. Among variants that were present in only the WES+IMP dataset, there were 126,319 missense variants – compared to 88,448 missense variants specific to the WGS data – the largest increase for a coding variant consequence. In contrast, the largest proportional gain was for variants that were present only in the WGS data for in-frame indels or predicted-loss-of-function (pLOF) variants – there were 9.3% more pLOFs and 23.5% more in-frame indels specific to the WGS data, but only 7.2% more pLOFs and 5.6% more in-frame indels specific to the WES+IMP data. Overall, 2.7% of coding variants were observed only in WGS and 3.1% of variants were observed only in WES+IMP. The coding variation was even more similar when limiting comparison to the target capture regions (Supplementary Table 4).

## Supplementary Figure 1.

**Flowchart of analytical UKB sample.** The analysis includes individuals from the UK Biobank with WES, imputed array, and WGS data with all analytical datasets in the dotted box. The primary analytical dataset includes 149,195 individuals who have all data sources available (bold); secondary datasets include (a) 468,169 individuals with WES and imputed array data and (b) a subset of 47,545 individuals with WGS.

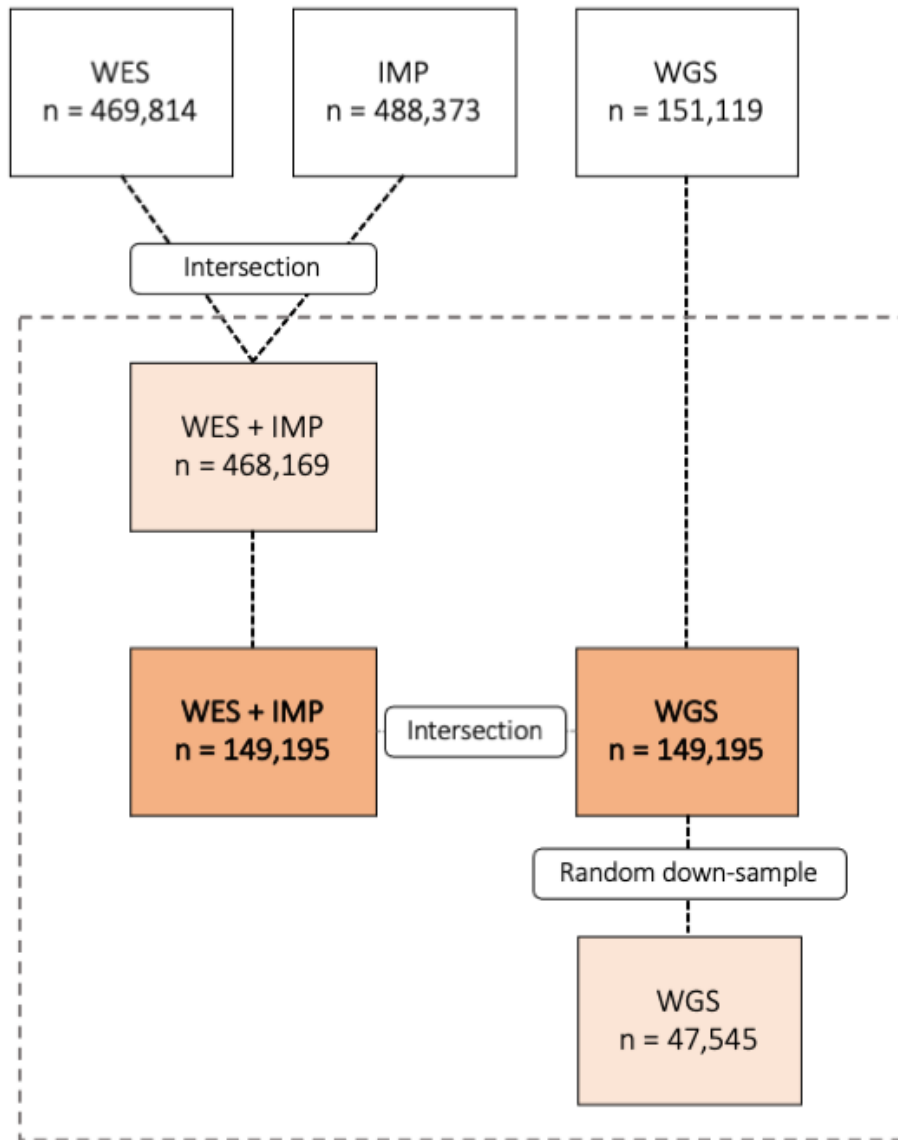

## Supplementary Figure 2.

**Flowchart of primary analyses.** Analyses of the primary datasets (n=149,195) included performing single variant and gene-based association testing for WES, imputed array, and WGS data. The same tests were performed on the secondary datasets (n=468,169 and n=47,545).

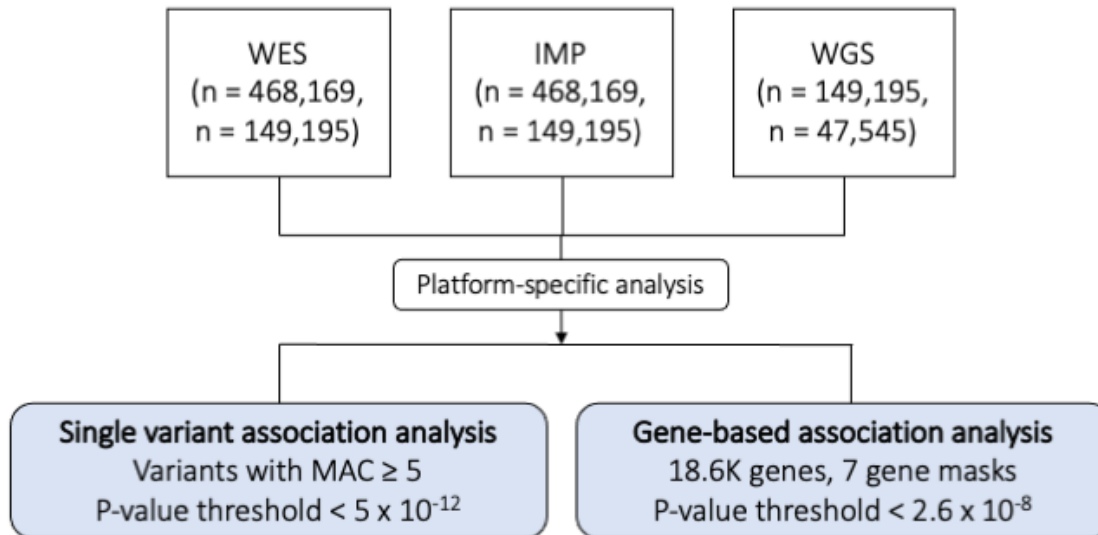

### Supplementary Figure 3.

**Survey of coding variation for WGS and WES+IMP.** A comparison of the coding variation observed by the WES+IMP and WGS datasets stratified by functional consequence. In Panel A, the count of variants observed in each approach, in both approaches, and in only one approach is given; the percentage gains in approach-specific variants is also given. In Panel B, the variant count per individual (n=149,195) is given; the point provides the average and the error bars representing the corresponding standard errors.

**A**

| Consequence            | WGS<br>(% Singleton) | WES+IMP<br>(% Singleton) | Intersection | WGS only | WES+IMP only | % WGS only | % WES+IMP only |
|------------------------|----------------------|--------------------------|--------------|----------|--------------|------------|----------------|
| <b>Coding variants</b> | 6,732,108 (48%)      | 6,761,880 (48%)          | 6,544,263    | 187,845  | 217,617      | 2.7        | 3.1            |
| <b>Missense</b>        | 4,225,468 (49%)      | 4,263,339 (48%)          | 4,137,020    | 88,448   | 126,319      | 2.0        | 2.9            |
| <b>Synonymous</b>      | 1,994,972 (44%)      | 2,012,866 (44%)          | 1,959,714    | 35,258   | 53,152       | 1.7        | 2.6            |
| <b>In-frame indel</b>  | 87,080 (51%)         | 70,543 (45%)             | 65,383       | 21,697   | 5,160        | 23.5       | 5.6            |
| <b>pLoF</b>            | 424,588 (60%)        | 415,132 (58%)            | 382,146      | 42,442   | 32,986       | 9.3        | 7.2            |
| Frameshift             | 190,713 (63%)        | 182,447 (60%)            | 162,815      | 27,898   | 19,632       | 13.3       | 9.3            |
| Stop gained            | 130,968 (56%)        | 132,452 (56%)            | 126,845      | 4,123    | 5,607        | 3.0        | 4.1            |
| Start lost             | 12,058 (52%)         | 11,744 (51%)             | 11,374       | 684      | 370          | 5.5        | 3.0            |
| Stop lost              | 4,599 (58%)          | 4,417 (57%)              | 4,184        | 415      | 233          | 8.6        | 4.8            |
| Splice donor           | 49,170 (60%)         | 46,658 (59%)             | 43,151       | 6,019    | 3,507        | 11.4       | 6.7            |
| Splice acceptor        | 37,080 (62%)         | 37,414 (61%)             | 33,777       | 3,303    | 3,637        | 8.1        | 8.9            |

**B**

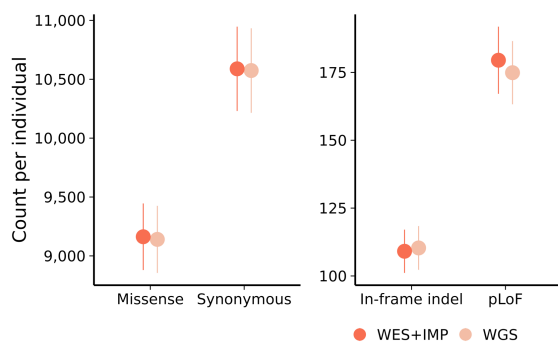

## Supplementary Figure 4.

**Flowchart of unified GENE\_P test.** Gene-based association analyses primarily focused on a single, unified p-value per gene. This gene-p p-value aggregates across multiple variant frequencies, masks (Supplementary Table 6), and set-based testing methods. The flowchart visualized how the single variants from a given gene are combined and tested to yield a single gene-level p-value, where gray arrows indicate aggregation by ACAT (Liu et al., 2019).

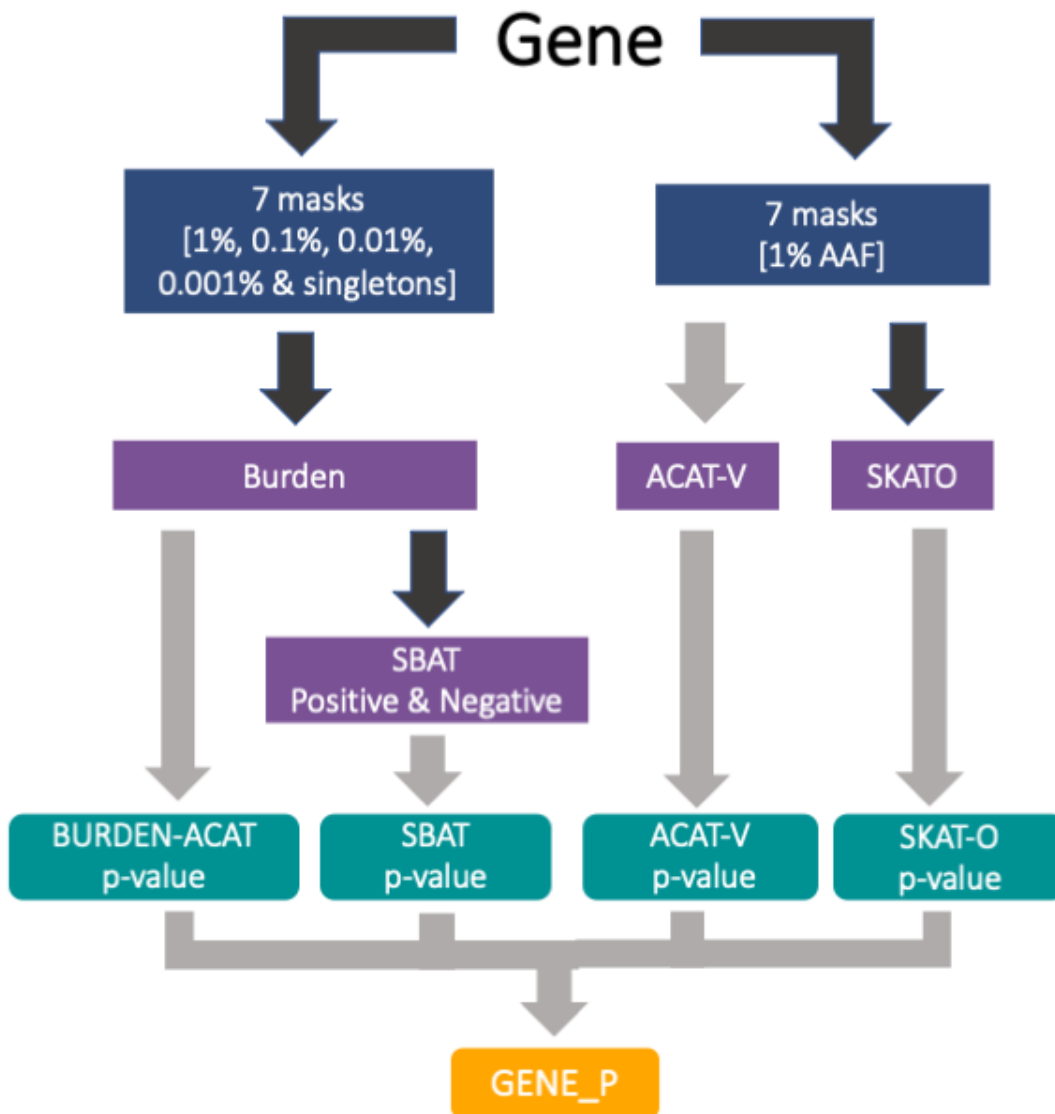

## Supplementary Figure 5.

**Summary of allele frequency, effect size, and p-value of all single variant association signals.** Single variant associations are grouped by the platform in which they were observed. Key features of the signals, AAF, effect size, and  $-\log_{10}(p\text{-value})$ , are plotted for each signal in all groups. The median value is plotted with box bounded by 25<sup>th</sup> and 75<sup>th</sup> percentiles, with whiskers extending from the box to values within 1.5\*Interquartile Range, and outlying values (minima/maxima) as points.

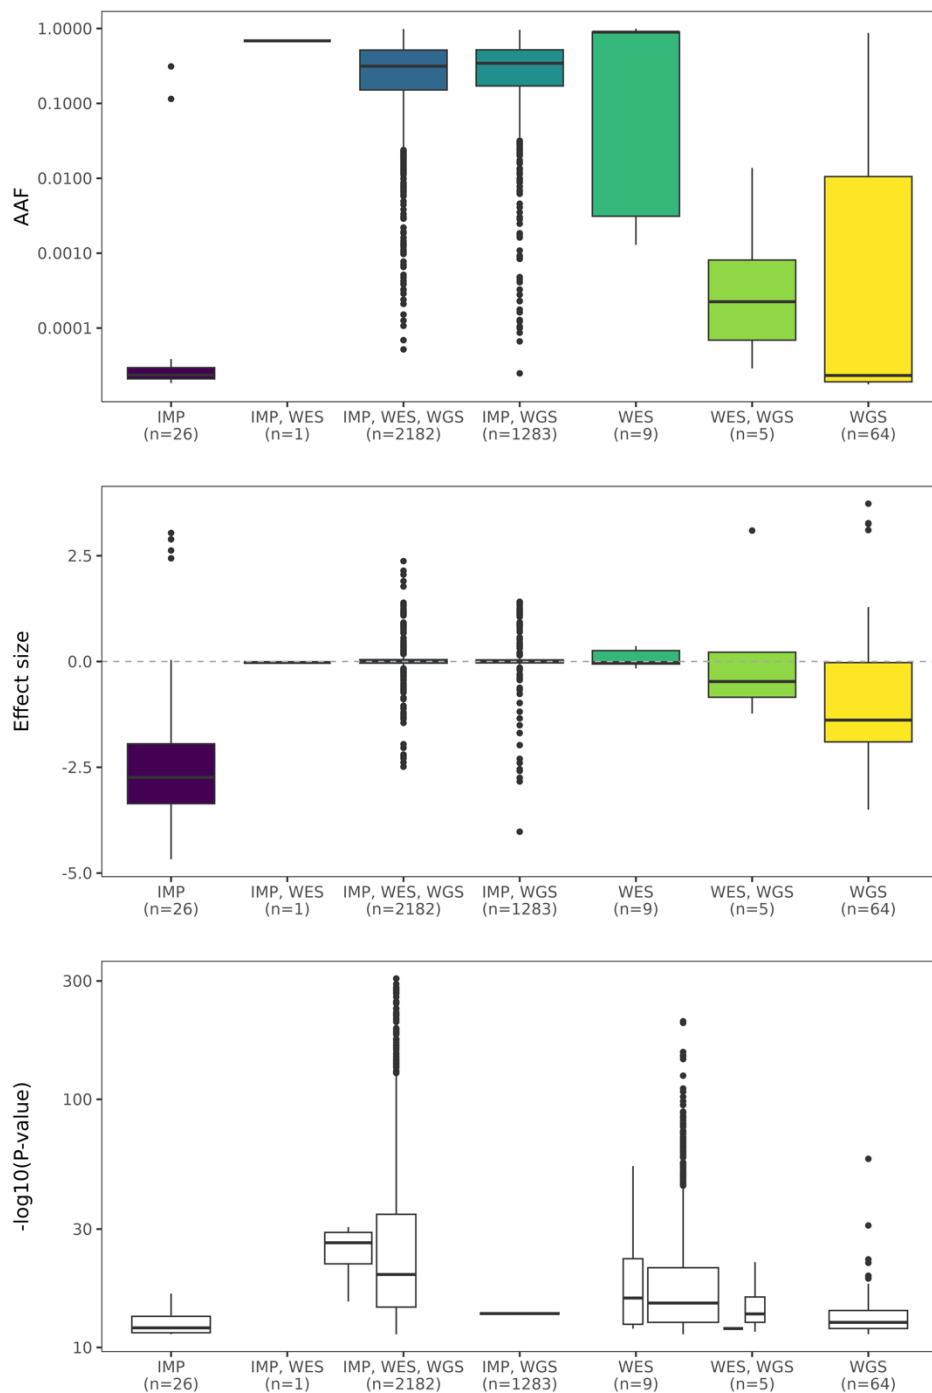



## Supplementary Figure 6.

**LocusZoom plot of lead single variant signals detected by all platforms.** A 1Mb region centered around most significant single variant association that was supported across all platforms (WGS, WES, IMP, WGS – SV). This was defined as observing an association with a p-value within an order of magnitude of the threshold of significance within a 1Mb region of the index association. The association is shown for 12:21178615:T:C (rs4149056), associated with Total bilirubin and identified first from the WGS sequencing data with p-value  $2.23 \times 10^{-307}$ . This missense variant lies in an exon of gene *SLCO1B1*, and is commonly observed with AAF=0.15.

### WGS

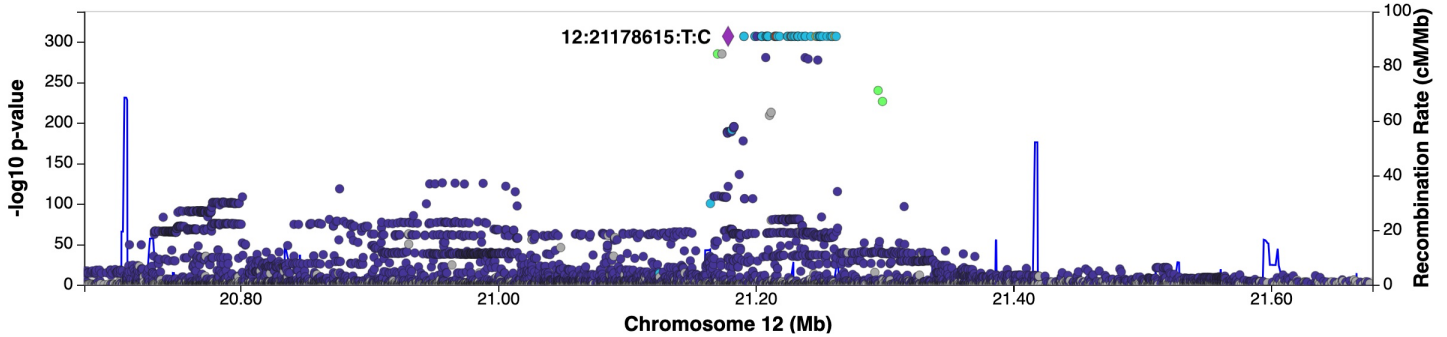

### WES

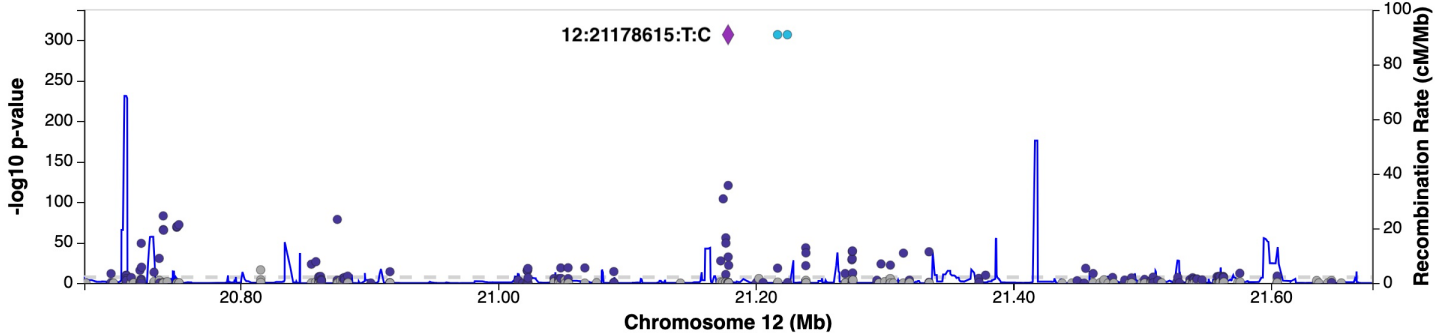

### IMP

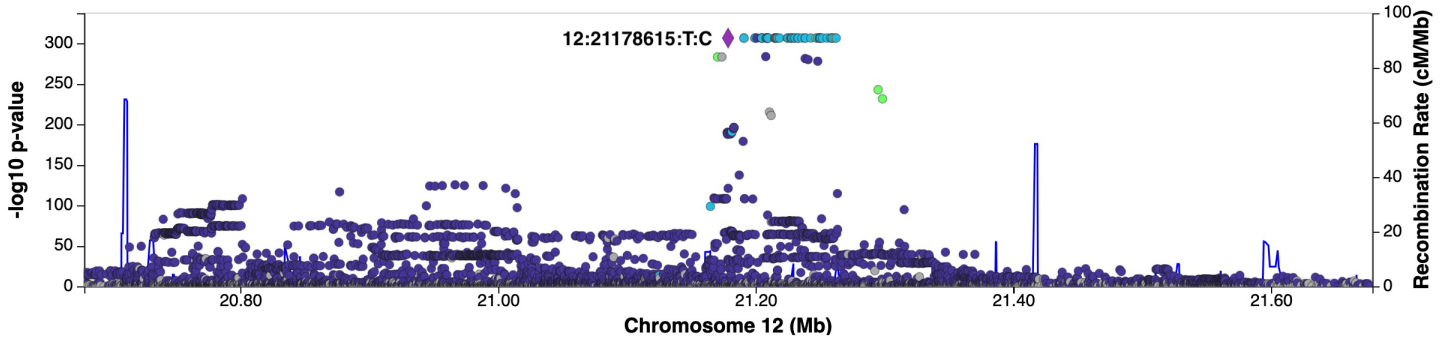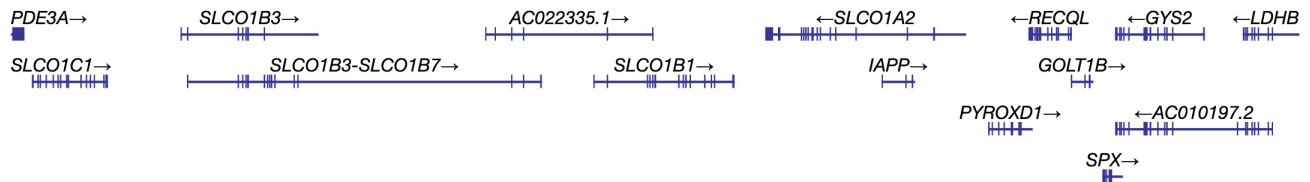

## Supplementary Figure 7.

LocusZoom plots of single variant signals detected only by WGS. A 1Mb region centered on a peak single variant association signal observed only in WGS. This intronic variant, 4:23156769:C:T, is associated with forced vital capacity with p-value  $3.06e-12$  and AAF=1.9e-5. It is supported by additional associated variants in WGS.

### WGS

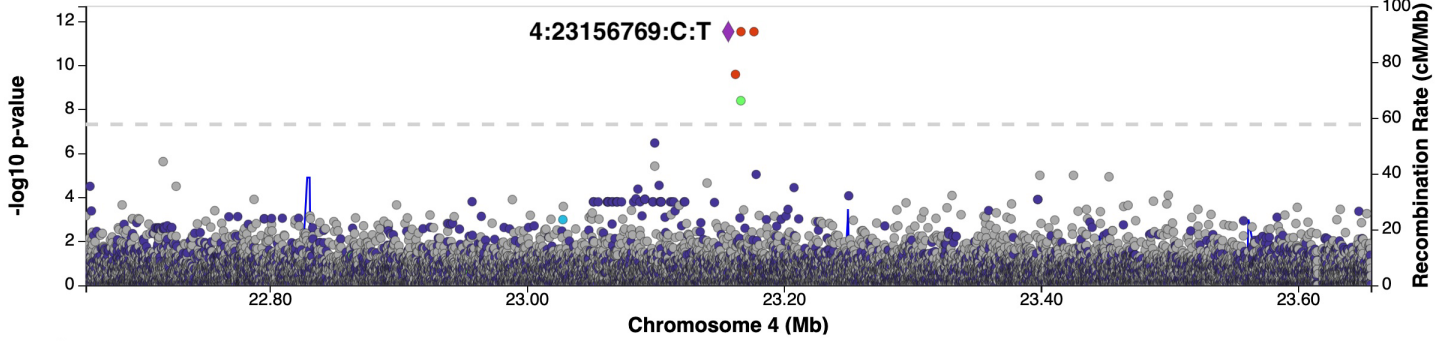

### WES

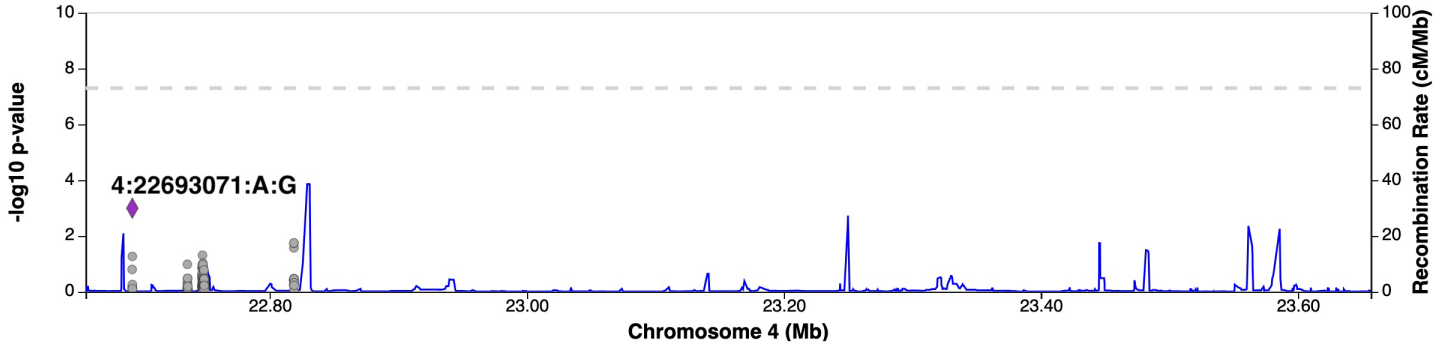

### IMP

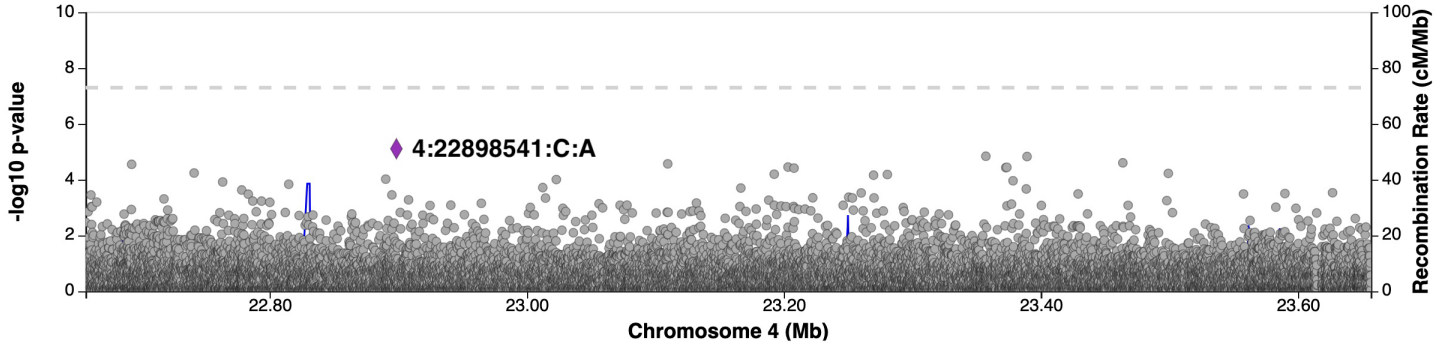

## Supplementary Figure 8.

**LocusZoom plots of single variant signals detected only by WES.** A 1Mb region centered on a peak single variant association signal observed only in WES. Variant 14:33367284:AAAG:A is an intronic variant in gene *NPAS3*. It is associated with mean reticulocyte volume with p-value  $3.99 \times 10^{-13}$  and AAF 0.0020. The most significant variant in the region in WES is neighboring with a p-value below the commonly recognized  $5 \times 10^{-8}$  GWAS threshold. Similar signal is not observed in WGS and IMP.

### WGS

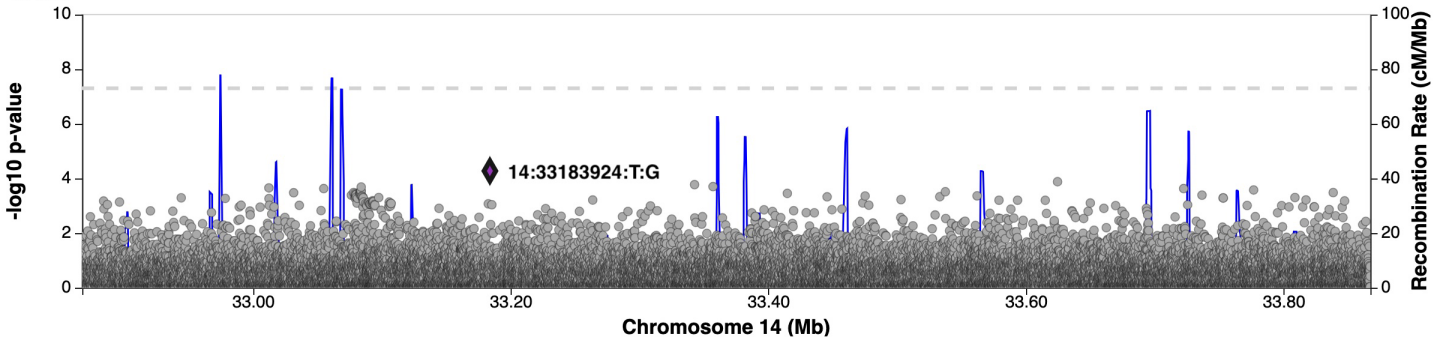

### WES

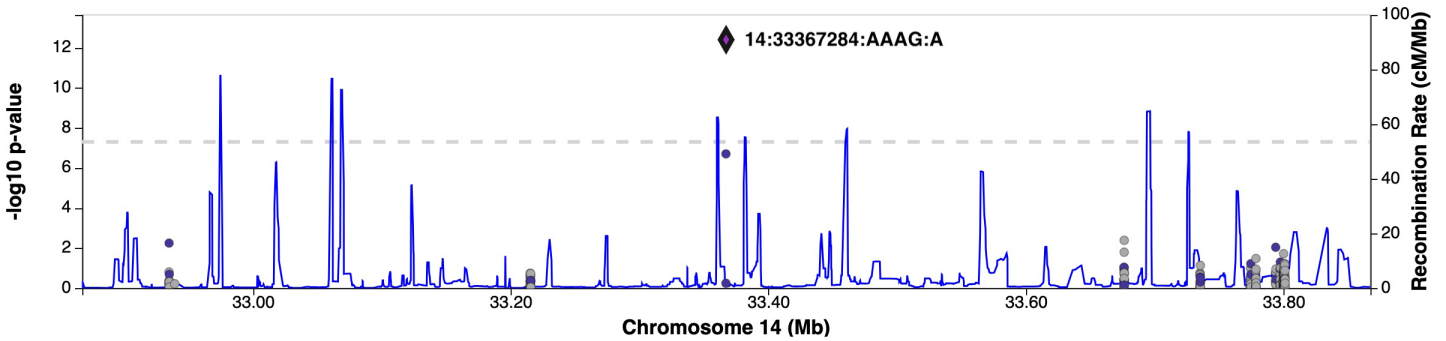

### IMP

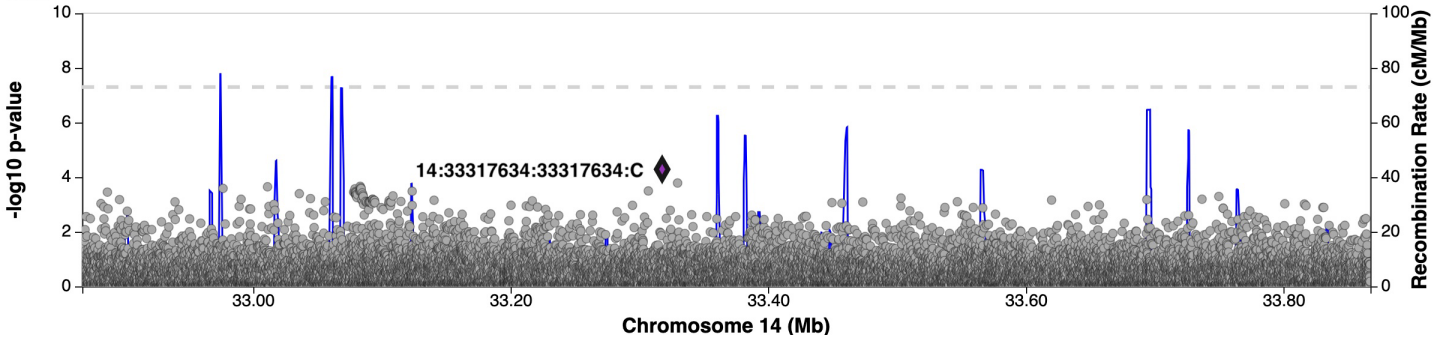

## Supplementary Figure 9.

LocusZoom plots of single variant signals detected only by IMP. A 1Mb region centered on a peak single variant association signal observed only in IMP. This intergenic variant, 9:104216027:T:G, is associated with impedance of whole body with p-value  $2.49 \times 10^{-12}$  and AAF= $3.1 \times 10^{-5}$ . It is supported by other variants in IMP.

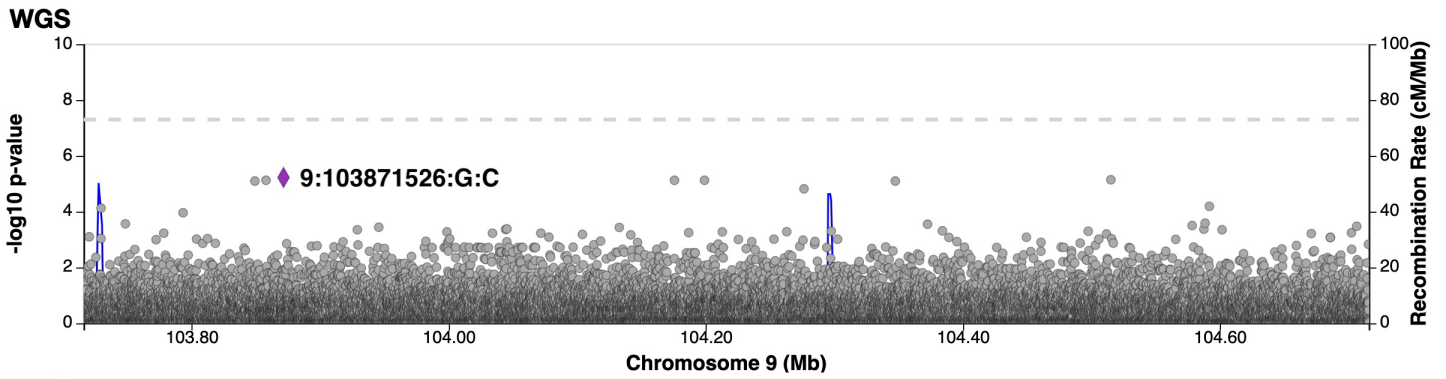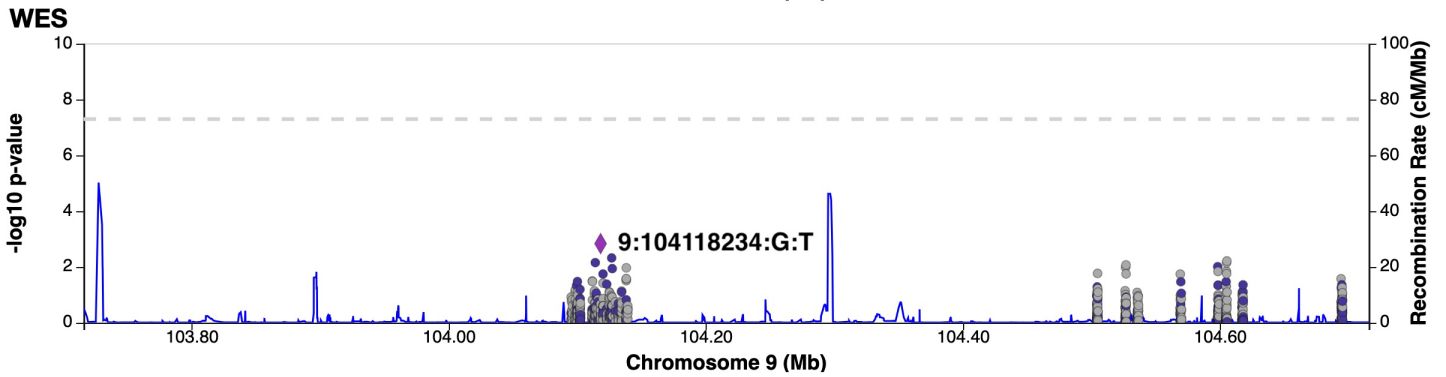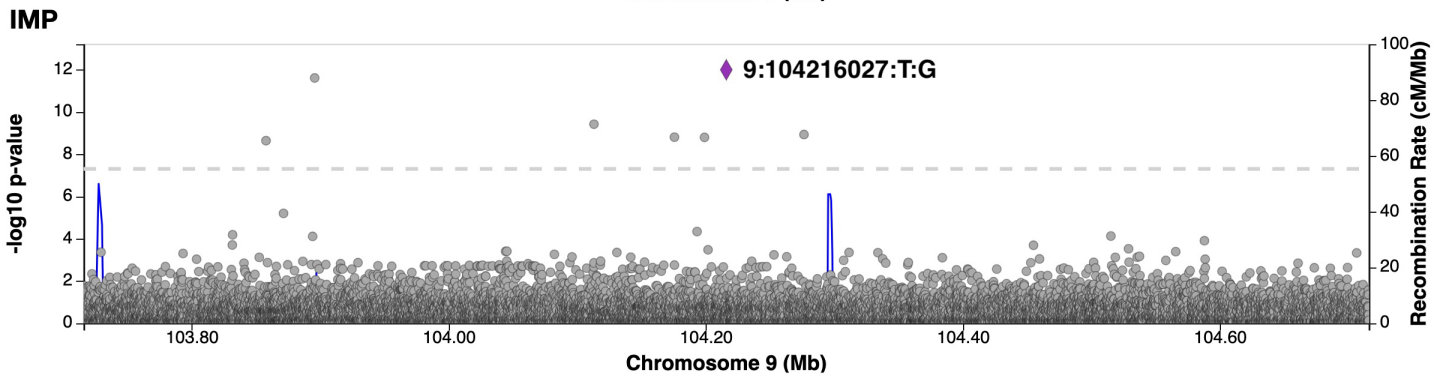

SMC2→

OR13F1→

←OR13C9

←OR13C4

OR13D1→

←OR13C3

OR13C8→

←OR13C5

## Supplementary Figure 10.

**Summary of p-value of all gene-based association signals.** Gene-based associations are grouped by the platform in which they were observed. The unified GENE\_P p-value, incorporating multiple statistical tests and masks, are plotted for each signal in all groups. The median value is plotted with box bounded by 25<sup>th</sup> and 75<sup>th</sup> percentiles, with whiskers extending from the box to values within 1.5\*Interquartile Range, and outlying values (minima/maxima) as points.

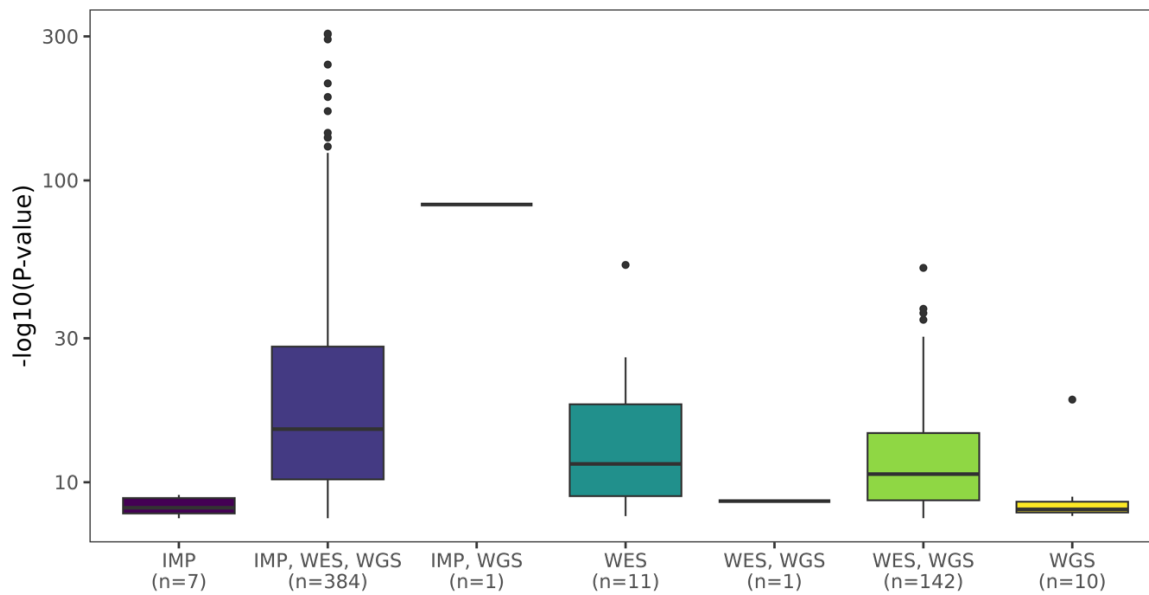

## Supplementary Figure 11.

Comparison of GENE\_P p-values for gene-based analyses between platforms. For each gene tested, the two-sided, unadjusted p-value between each pair of platforms is given for all tests and for those with  $-\log_{10}(p - \text{value})$ .

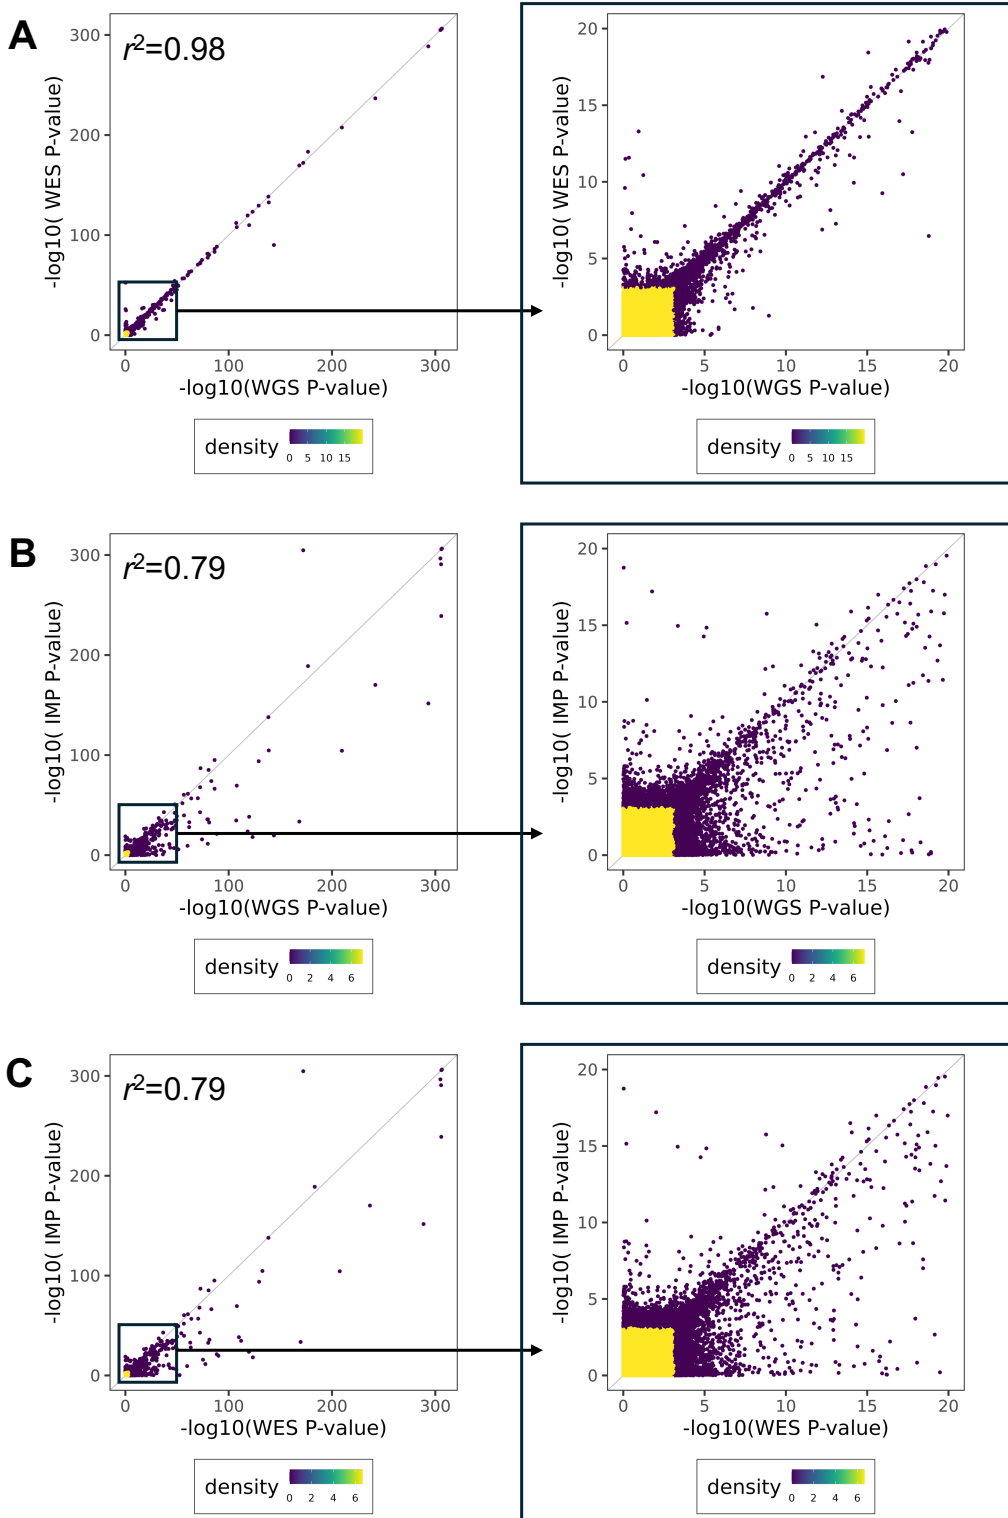

## Supplementary Figure 12.

**Evaluation of TOPMed-based imputation accuracy ( $R^2$ ) across ancestry groups.** Across allele frequency bins, where sufficient variation was observed, the imputation accuracy is given in comparison to the observed WGS.

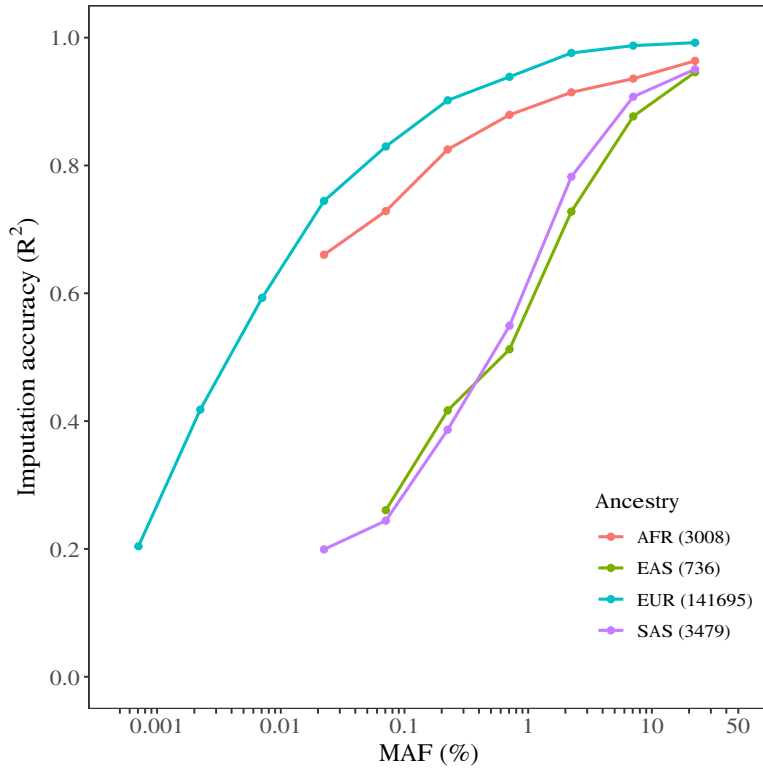

### Supplementary Figure 13.

**Comparison of TOPMed-based and UKB-based imputation accuracy ( $R^2$ ).** We imputed 1,000 white British individuals who had both WGS and array data. Imputation was based on (1) a reference panel generated from 200K UKB phased WGS samples and (2) a TOPMed reference panel, and compared. Across allele frequency bins, where sufficient variation was observed, the imputation accuracy is given for imputation based on a TOPMed reference panel and UKB 200K reference panel.

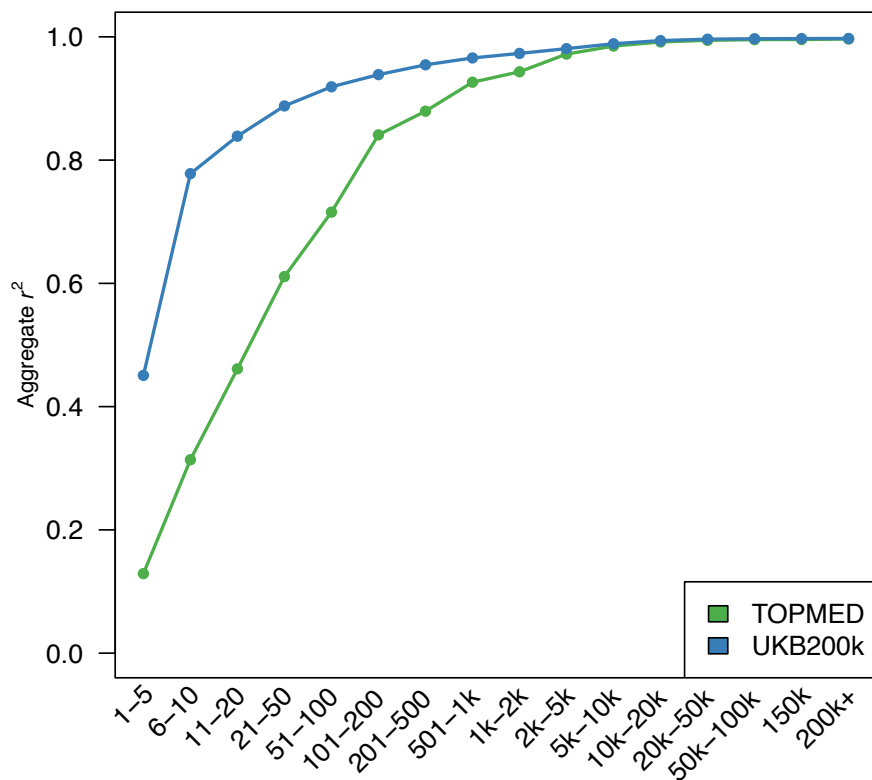



## Supplementary Table 1.

**Characteristics of the UKB data.** Analyses included UKB data with three sample sizes, comprised of individuals with an assigned ancestry. Demographic features of these individuals are provided.

| Sample size | Platforms analyzed | Sex - Female    | Mean age (SD) | Ancestry                                   |                                 |
|-------------|--------------------|-----------------|---------------|--------------------------------------------|---------------------------------|
| 47,545      | WGS                | 26,384 (55.5%)  | 56.5 (8.1)    | 982<br>97<br>227<br>45,093<br>1,146        | AFR<br>AMR<br>EAS<br>EUR<br>SAS |
| 149,195     | IMP, WES, WGS      | 82,210 (55.1%)  | 56.5 (8.1)    | 3,008<br>277<br>736<br>141,695<br>3,479    | AFR<br>AMR<br>EAS<br>EUR<br>SAS |
| 468,169     | IMP, WES           | 253,697 (54.2%) | 56.5 (8.1)    | 9,277<br>856<br>2,303<br>445,544<br>10,189 | AFR<br>AMR<br>EAS<br>EUR<br>SAS |

## Supplementary Table 2.

**Genotype concordance between the different approaches.** For all autosomal variants that passed QC in each platform, after enforcing hard calls, we assessed the number of mean discordant calls per variant and the concordance across all variant calls.

| Datasets  | Number of variants compared | Mean number of discordant calls per variant | Concordance |
|-----------|-----------------------------|---------------------------------------------|-------------|
| WGS & WES | 15,840,174                  | 9.6                                         | 99.99%      |
| WES & IMP | 2,371,567                   | 75.3                                        | 99.95%      |
| WGS & IMP | 89,809,894                  | 72.2                                        | 99.95%      |

## Supplementary Table 3.

**Number of canonical coding variants in WGS and WES+IMP datasets.** Count of variants for each coding consequence, stratified by frequency. Variants were annotated with VEP and genes were defined by Ensembl v100.

| Consequence | Frequency             | WGS       | WES+IMP   | Union     | Intersection | WGS only | WES+IMP only |
|-------------|-----------------------|-----------|-----------|-----------|--------------|----------|--------------|
| Missense    | Singleton (AAC=1)     | 2,055,463 | 2,056,701 | 2,113,288 | 1,998,876    | 56,587   | 57,825       |
|             | AAC>1 & AAF<=0.0001   | 1,935,023 | 1,968,371 | 1,999,707 | 1,903,687    | 31,336   | 64,684       |
|             | AAF>0.001 & AAF<=0.01 | 208,238   | 211,273   | 211,740   | 207,771      | 467      | 3,502        |
|             | AAF>0.01              | 26,744    | 26,994    | 27,052    | 26,686       | 58       | 308          |
| Stop gained | Singleton (AAC=1)     | 73,515    | 73,664    | 76,502    | 70,677       | 2,838    | 2,987        |
|             | AAC>1 & AAF<=0.0001   | 53,823    | 55,045    | 56,312    | 52,556       | 1,267    | 2,489        |
|             | AAF>0.001 & AAF<=0.01 | 3,429     | 3,537     | 3,554     | 3,412        | 17       | 125          |
|             | AAC>1 & AAF<=0.0001   | 53,823    | 55,045    | 56,312    | 52,556       | 1,267    | 2,489        |
|             | AAF>0.01              | 201       | 206       | 207       | 200          | 1        | 6            |
| Synonymous  | Singleton (AAC=1)     | 884,307   | 886,016   | 907,833   | 862,490      | 21,817   | 23,526       |
|             | AAC>1 & AAF<=0.0001   | 943,930   | 958,636   | 971,785   | 930,781      | 13,149   | 27,855       |

|                        |                       |         |         |         |         |        |        |
|------------------------|-----------------------|---------|---------|---------|---------|--------|--------|
|                        | AAF>0.001 & AAF<=0.01 | 138,548 | 139,882 | 140,132 | 138,298 | 250    | 1,584  |
|                        | AAF>0.01              | 28,187  | 28,332  | 28,374  | 28,145  | 42     | 187    |
| In-frame indel         | Singleton (AAC=1)     | 44,268  | 31,537  | 46,642  | 29,163  | 15,105 | 2,374  |
|                        | AAC>1 & AAF<=0.0001   | 38,109  | 34,143  | 40,573  | 31,679  | 6,430  | 2,464  |
|                        | AAF>0.001 & AAF<=0.01 | 4,311   | 4,450   | 4,599   | 4,162   | 149    | 288    |
|                        | AAF>0.01              | 392     | 413     | 426     | 379     | 13     | 34     |
| Frameshift             | Singleton (AAC=1)     | 120,430 | 108,817 | 130,794 | 98,453  | 21,977 | 10,364 |
|                        | AAC>1 & AAF<=0.0001   | 65,982  | 68,518  | 74,362  | 60,138  | 5,844  | 8,380  |
|                        | AAF>0.001 & AAF<=0.01 | 4,065   | 4,813   | 4,878   | 4,000   | 65     | 813    |
|                        | AAF>0.01              | 236     | 299     | 311     | 224     | 12     | 75     |
| Splice donor           | Singleton (AAC=1)     | 27,177  | 27,000  | 29,192  | 24,985  | 2,192  | 2,015  |
|                        | AAC>1 & AAF<=0.0001   | 16,549  | 17,209  | 17,875  | 15,883  | 666    | 1,326  |
|                        | AAF>0.001 & AAF<=0.01 | 1,097   | 1,143   | 1,155   | 1,085   | 12     | 58     |
|                        | AAF>0.01              | 63      | 67      | 70      | 60      | 3      | 7      |
| Splice acceptor        | Singleton (AAC=1)     | 21,344  | 21,693  | 23,321  | 19,716  | 1,628  | 1,977  |
|                        | AAC>1 & AAF<=0.0001   | 11,993  | 12,814  | 13,320  | 11,487  | 506    | 1,327  |
|                        | AAF>0.001 & AAF<=0.01 | 721     | 749     | 752     | 718     | 3      | 31     |
|                        | AAF>0.01              | 39      | 41      | 41      | 39      | 0      | 2      |
| Start lost             | Singleton (AAC=1)     | 6,250   | 5,968   | 6,418   | 5,800   | 450    | 168    |
|                        | AAC>1 & AAF<=0.0001   | 5,351   | 5,307   | 5,537   | 5,121   | 230    | 186    |
|                        | AAF>0.001 & AAF<=0.01 | 421     | 432     | 436     | 417     | 4      | 15     |
|                        | AAF>0.01              | 36      | 37      | 37      | 36      | 0      | 1      |
| Stop lost              | Singleton (AAC=1)     | 2,678   | 2,509   | 2,810   | 2,377   | 301    | 132    |
|                        | AAC>1 & AAF<=0.0001   | 1,751   | 1,736   | 1,847   | 1,640   | 111    | 96     |
|                        | AAF>0.001 & AAF<=0.01 | 153     | 155     | 158     | 150     | 3      | 5      |
|                        | AAF>0.01              | 17      | 17      | 17      | 17      | 0      | 0      |
| 5' UTR splice acceptor | Singleton (AAC=1)     | 1,559   | 1,113   | 1,741   | 931     | 628    | 182    |
|                        | AAC>1 & AAF<=0.0001   | 1,066   | 811     | 1,171   | 706     | 360    | 105    |
|                        | AAF>0.001 & AAF<=0.01 | 94      | 98      | 99      | 93      | 1      | 5      |
|                        | AAF>0.01              | 10      | 11      | 11      | 10      | 0      | 1      |
| 3' UTR splice acceptor | Singleton (AAC=1)     | 134     | 23      | 136     | 21      | 113    | 2      |
|                        | AAC>1 & AAF<=0.0001   | 103     | 42      | 106     | 39      | 64     | 3      |
|                        | AAF>0.001 & AAF<=0.01 | 16      | 18      | 18      | 16      | 0      | 2      |
|                        | AAF>0.01              | 1       | 1       | 1       | 1       | 0      | 0      |
| 5' UTR splice donor    | Singleton (AAC=1)     | 2,119   | 284     | 2,139   | 264     | 1,855  | 20     |
|                        | AAC>1 & AAF<=0.0001   | 1,655   | 476     | 1,699   | 432     | 1,223  | 44     |

|                     |                       |     |     |     |     |    |    |
|---------------------|-----------------------|-----|-----|-----|-----|----|----|
|                     | AAF>0.001 & AAF<=0.01 | 155 | 152 | 158 | 149 | 6  | 3  |
|                     | AAF>0.01              | 25  | 25  | 25  | 25  | 0  | 0  |
| 3' UTR splice donor | Singleton (AAC=1)     | 178 | 153 | 199 | 132 | 46 | 21 |
|                     | AAC>1 & AAF<=0.0001   | 124 | 121 | 136 | 109 | 15 | 12 |
|                     | AAF>0.001 & AAF<=0.01 | 20  | 21  | 21  | 20  | 0  | 1  |
|                     | AAF>0.01              | 8   | 7   | 8   | 7   | 1  | 0  |

### Supplementary Table 4.

**Number of canonical coding variants in target capture regions for WGS and WES+IMP datasets.** Count of variants for each coding consequence when limiting to variants within the WES targeted capture regions. Variants were annotated with VEP and genes were defined by Ensembl v100. pLoFs included frameshift, splice donor, splice acceptor, stop gained, stop lost, and start lost variants.

| Consequence    | WGS     | WES+IMP | Union   | Intersection | WGS only | WES+IMP only |
|----------------|---------|---------|---------|--------------|----------|--------------|
| Missense       | 4155578 | 4244803 | 4279583 | 4120798      | 34780    | 124005       |
| Synonymous     | 1964215 | 2003872 | 2016349 | 1951738      | 12477    | 52134        |
| In-frame indel | 84619   | 69754   | 89655   | 64718        | 19901    | 5036         |
| pLoF           | 358211  | 356825  | 385531  | 329505       | 28706    | 27320        |

### Supplementary Table 5.

**Single variant signal consequences by platforms with association observed.** Count of variants for each consequence with an observed trait association, given by the platforms in which the signal is observed. Variants were annotated with VEP and genes were defined by Ensembl v100.

| Consequence    | IMP | IMP, WES | IMP, WES, WGS | IMP, WGS | WES | WES, WGS | WGS |
|----------------|-----|----------|---------------|----------|-----|----------|-----|
| 3' UTR         | 0   | 0        | 75            | 27       | 0   | 0        | 1   |
| 5' UTR         | 0   | 0        | 27            | 9        | 0   | 0        | 0   |
| Downstream     | 1   | 0        | 108           | 23       | 0   | 0        | 2   |
| Frameshift     | 0   | 0        | 5             | 0        | 0   | 1        | 0   |
| In-frame indel | 0   | 0        | 6             | 0        | 0   | 0        | 0   |
| Intergenic     | 17  | 0        | 422           | 691      | 0   | 0        | 38  |
| Intronic       | 8   | 1        | 1,014         | 467      | 7   | 2        | 22  |
| Missense       | 0   | 0        | 281           | 0        | 1   | 1        | 0   |
| Splice donor   | 0   | 0        | 2             | 0        | 0   | 1        | 0   |
| Splice region  | 0   | 0        | 6             | 0        | 0   | 0        | 0   |
| Stop gained    | 0   | 0        | 10            | 0        | 0   | 0        | 0   |
| Synonymous     | 0   | 0        | 28            | 0        | 0   | 0        | 0   |
| Upstream       | 0   | 0        | 198           | 66       | 1   | 0        | 1   |

## Supplementary Table 6.

**Gene burden mask definitions.** For gene-based testing, variants were grouped into seven different masks by variant consequence. The variants were annotated with VEP and Ensembl 100, and aggregated into masks for tests in Regenie.

| Mask            | Variant consequences included                                                                                                                                                                                                                                                                |
|-----------------|----------------------------------------------------------------------------------------------------------------------------------------------------------------------------------------------------------------------------------------------------------------------------------------------|
| pLoF            | stop_gained, stop_gain, frameshift, splice_donor, splice_acceptor                                                                                                                                                                                                                            |
| pLoF_missense_5 | stop_gained, stop_gain, frameshift, splice_donor, splice_acceptor, start_lost, stop_lost, missense(5/5)                                                                                                                                                                                      |
| pLoF_missense_1 | stop_gained, stop_gain, frameshift, splice_donor, splice_acceptor, start_lost, stop_lost, missense(5/5), missense(>=1/5), UTR_splice_donor, 5_prime_UTR_splice_donor, 3_prime_UTR_splice_donor, UTR_splice_acceptor, 5_prime_UTR_splice_acceptor, 3_prime_UTR_splice_acceptor                |
| pLoF_missense_0 | stop_gained, stop_gain, frameshift, splice_donor, splice_acceptor, start_lost, stop_lost, missense(5/5), missense(>=1/5), missense(0/5), UTR_splice_donor, 5_prime_UTR_splice_donor, 3_prime_UTR_splice_donor, UTR_splice_acceptor, 5_prime_UTR_splice_acceptor, 3_prime_UTR_splice_acceptor |
| missense_5      | start_lost, stop_lost, missense(5/5)                                                                                                                                                                                                                                                         |
| missense_1      | start_lost, stop_lost, missense(5/5), missense(>=1/5)                                                                                                                                                                                                                                        |
| missense_0      | start_lost, stop_lost, missense(5/5), missense(>=1/5), missense(0/5)                                                                                                                                                                                                                         |

## Supplementary Table 7.

**Single and rare variant signals when considering alternative significance thresholds.** For single variant testing, we summarize results for the association analysis using our main analysis significance threshold of  $P=5 \times 10^{-12}$  and under a relaxed significance threshold of  $P=5 \times 10^{-10}$ . For gene-based testing, we summarize the results of our analysis using our main analysis significant threshold of  $P=2.6 \times 10^{-8}$  and a relaxed significant threshold of  $P=2.6 \times 10^{-6}$ .

|              | Single variant analysis          |                                      | Gene-based analysis              |                                      |
|--------------|----------------------------------|--------------------------------------|----------------------------------|--------------------------------------|
|              | Number of signals, main analysis | Number of signals, relaxed threshold | Number of signals, main analysis | Number of signals, relaxed threshold |
| Shared       | 3,470                            | 4,889                                | 528                              | 859                                  |
| WGS only     | 64                               | 241                                  | 10                               | 21                                   |
| WES+IMP only | 36                               | 167                                  | 18                               | 38                                   |

## Supplementary Table 8.

**Single variant signals detected only by structural variant analyses.** We analyzed structural variants from the WGS data using the single variant approach, and then jointly performed peak finding with the WGS, WES, and imputed data (significance threshold of  $P=5 \times 10^{-12}$ ). The signals exclusive to structural variants are summarized.

| Trait                                          | Structural variant                              | P-value  |
|------------------------------------------------|-------------------------------------------------|----------|
| 30080_Platelet_count_inst_mean__RINT           | chr17:25233296:N:<DUP:SVSIZE=343:AGGREGATED>:SV | 5.24E-13 |
| 30260_Mean_reticulocyte_volume_inst_mean__RINT | chr17:25828349:N:<DUP:SVSIZE=672:AGGREGATED>:SV | 5.71E-29 |
| 30260_Mean_reticulocyte_volume_inst_mean__RINT | chr1:113416208:N:<DEL:SVSIZE=88:AGGREGATED>:SV  | 8.23E-14 |
| 30260_Mean_reticulocyte_volume_inst_mean__RINT | chr1:118319009:N:<DEL:SVSIZE=63:AGGREGATED>:SV  | 9.64E-20 |
| 30260_Mean_reticulocyte_volume_inst_mean__RINT | chr1:194098949:N:<DEL:SVSIZE=299:AGGREGATED>:SV | 8.58E-19 |
| 30260_Mean_reticulocyte_volume_inst_mean__RINT | chr1:197164767:N:<DEL:SVSIZE=59:AGGREGATED>:SV  | 6.69E-14 |
| 30260_Mean_reticulocyte_volume_inst_mean__RINT | chr1:232368256:N:<DEL:SVSIZE=225:AGGREGATED>:SV | 4.92E-19 |
| 30260_Mean_reticulocyte_volume_inst_mean__RINT | chr1:91169079:N:<DEL:SVSIZE=126:AGGREGATED>:SV  | 3.39E-15 |
| 30260_Mean_reticulocyte_volume_inst_mean__RINT | chr1:97323337:N:<DEL:SVSIZE=119:AGGREGATED>:SV  | 4.26E-20 |
| 30260_Mean_reticulocyte_volume_inst_mean__RINT | chr5:164328528:N:<DEL:SVSIZE=606:AGGREGATED>:SV | 1.54E-13 |
| 30810_Phosphate_inst_mean__RINT                | chr17:25828349:N:<DUP:SVSIZE=672:AGGREGATED>:SV | 5.98E-18 |
| 30810_Phosphate_inst_mean__RINT                | chr1:118319009:N:<DEL:SVSIZE=63:AGGREGATED>:SV  | 2.23E-13 |

|                                                             |                                                  |          |
|-------------------------------------------------------------|--------------------------------------------------|----------|
| 30810_Phosphate_inst_mean__RINT                             | chr1:97323337:N:<DEL:SVSIZE=119:AGGREGATED>:SV   | 1.02E-18 |
| 30870_Triglycerides_inst_mean__RINT                         | chr3:172556424:N:<DEL:SVSIZE=2317:AGGREGATED>:SV | 2.38E-12 |
| 30880_Urate_inst_mean__RINT                                 | chr1:124976466:N:<DEL:SVSIZE=2688:AGGREGATED>:SV | 1.93E-25 |
| 3581_Age_at_menopause_last_menstrual_period_inst_mean__RINT | chr19:3939254:N:<DEL:SVSIZE=754:AGGREGATED>:SV   | 1.24E-12 |

## Supplementary Data 1.

### Significant single variant tests.

*Attached.*

## Supplementary Data 2.

### Significant gene-based tests.

*Attached.*

## Supplementary Data 3.

### List of 100 traits used in association analysis.

*Attached.*

## List of Investigators from the Regeneron Genetics Center

### RGC Management & Leadership Team

Aris Baras<sup>1</sup>, Gonçalo R. Abecasis<sup>1</sup>, Adolfo Ferrando<sup>1</sup>, Michael Cantor<sup>1</sup>, Giovanni Coppola<sup>1</sup>, Andrew Deubler<sup>1</sup>, Aris Economides<sup>1</sup>, Luca A. Lotta<sup>1</sup>, John D. Overton<sup>1</sup>, Jeffrey G. Reid<sup>1</sup>, Alan Shuldiner<sup>1</sup>, Katherine Siminovitch<sup>1</sup>, Jason Portnoy<sup>1</sup>, Marcus B. Jones<sup>1</sup>, Lyndon Mitnau<sup>1</sup>, Alison Fenney<sup>1</sup>, Jonathan Marchini<sup>1</sup>, Manuel Allen Revez Ferreira<sup>1</sup>, Maya Ghousaini<sup>1</sup>, Mona Nafde<sup>1</sup>, William J. Salerno<sup>1</sup>

### Sequencing & Lab Operations

John D. Overton<sup>1</sup>, Christina Beechert<sup>1</sup>, Erin D. Brian<sup>1</sup>, Laura M. Cremona<sup>1</sup>, Hang Du<sup>1</sup>, Caitlin Forsythe<sup>1</sup>, Zhenhua Gu<sup>1</sup>, Kristy Guevara<sup>1</sup>, Michael Lattari<sup>1</sup>, Alexander Lopez<sup>1</sup>, Kia Manoochehri<sup>1</sup>, Prathyusha Challa<sup>1</sup>, Manasi Pradhan<sup>1</sup>, Raymond Reynoso<sup>1</sup>, Ricardo Schiavo<sup>1</sup>, Maria Sotiropoulos Padilla<sup>1</sup>, Chenggu Wang<sup>1</sup>, Sarah E. Wolf<sup>1</sup>

### Clinical Informatics

Michael Cantor<sup>1</sup>, Amelia Averitt<sup>1</sup>, Nilanjana Banerjee<sup>1</sup>, Dadong Li<sup>1</sup>, Sameer Malhotra<sup>1</sup>, Justin Mower<sup>1</sup>, Mudasar Sarwar<sup>1</sup>, Deepika Sharma<sup>1</sup>, Jeffrey C. Staples<sup>1</sup>, Sean Yu<sup>1</sup>, Aaron Zhang<sup>1</sup>, Muhammad Aqeel<sup>1</sup>

### Genome Informatics & Data Engineering

Jeffrey G. Reid<sup>1</sup>, Mona Nafde<sup>1</sup>, George Mitra<sup>1</sup>, Sujit Gokhale<sup>1</sup>, Krishna Pawan Punuru<sup>1</sup>, Sanjay Sreeram<sup>1</sup>, Gisu Eom<sup>1</sup>, Sujit Gokhale<sup>1</sup>, Benjamin Sultan<sup>1</sup>, Rouel Lanche<sup>1</sup>, Vrushali Mahajan<sup>1</sup>, Eliot Austin<sup>1</sup>, Sean O'Keefe<sup>1</sup>, Razvan Panea<sup>1</sup>, Ayesha Rasool<sup>1</sup>, William J. Salerno<sup>1</sup>, Xiaodong Bai<sup>1</sup>, Lance Zhang<sup>1</sup>, Boris Boutkov<sup>1</sup>, Evan Edelstein<sup>1</sup>, Alexander Gorovits<sup>1</sup>, Ju Guan<sup>1</sup>, Lukas Habegger<sup>1</sup>, Alicia Hawes<sup>1</sup>, Olga Krasheninina<sup>1</sup>, Samantha Zarate<sup>1</sup>, Adam J. Mansfield<sup>1</sup>, Evan K. Maxwell<sup>1</sup>, Suganthi Balasubramanian<sup>1</sup>, Suying Bao<sup>1</sup>, Kathie Sun<sup>1</sup>, Chuanyi Zhang<sup>1</sup>

### Analytical Genetics and Data Science

Gonçalo R. Abecasis<sup>1</sup>, Manuel Allen Revez Ferreira<sup>1</sup>, Joshua Backman<sup>1</sup>, Kathy Burch<sup>1</sup>, Adrian Campos<sup>1</sup>, Lei Chen<sup>1</sup>, Sam Choi<sup>1</sup>, Amy Damask<sup>1</sup>, Liron Ganel<sup>1</sup>, Sheila M. Gaynor<sup>1</sup>, Benjamin Geraghty<sup>1</sup>, Arkopravo Ghosh<sup>1</sup>, Salvador Romero Martinez<sup>1</sup>, Christopher Gillies<sup>1</sup>, Lauren Gurski<sup>1</sup>, Joseph Herman<sup>1</sup>, Eric Jorgenson<sup>1</sup>, Tyler Joseph<sup>1</sup>, Michael Kessler<sup>1</sup>, Jack Kosmicki<sup>1</sup>, Nan Lin<sup>1</sup>, Adam Locke<sup>1</sup>, Priyanka Nakka<sup>1</sup>, Jonathan Marchini<sup>1</sup>, Karl Landheer<sup>1</sup>, Olivier Delaneau<sup>1</sup>, Maya Ghousaini<sup>1</sup>, Anthony Marcketta<sup>1</sup>, Joelle Mbatchou<sup>1</sup>, Arden Moscati<sup>1</sup>, Aditeya Pandey<sup>1</sup>, Anita Pandit<sup>1</sup>, Charles Paulding<sup>1</sup>,

Jonathan Ross<sup>1</sup>, Carlo Sidore<sup>1</sup>, Eli Stahl<sup>1</sup>, Maria Suci<sup>1</sup>, Timothy A. Thornton<sup>1</sup>, Peter VandeHaar<sup>1</sup>, Sailaja Vedantam<sup>1</sup>, Scott Vrieze<sup>1</sup>, Jingning Zhang<sup>1</sup>, Rujin Wang<sup>1</sup>, Kuan-Han Wu<sup>1</sup>, Bin Ye<sup>1</sup>, Blair Zhang<sup>1</sup>, Andrey Ziyatdinov<sup>1</sup>, Yuxin Zou<sup>1</sup>, Olivier Delaneau<sup>1</sup>, Maya Ghousaini<sup>1</sup>, Jingning Zhang<sup>1</sup>, Kyoko Watanabe<sup>1</sup>, Mira Tang<sup>1</sup>, Frank Wendt<sup>1</sup>

### **Therapeutic Area Genetics**

Adolfo Ferrando<sup>1</sup>, Giovanni Coppola<sup>1</sup>, Luca A. Lotta<sup>1</sup>, Alan Shuldiner<sup>1</sup>, Katherine Siminovitch<sup>1</sup>, Brian Hobbs<sup>1</sup>, Jon Silver<sup>1</sup>, William Palmer<sup>1</sup>, Rita Guerreiro<sup>1</sup>, Amit Joshi<sup>1</sup>, Antoine Baldassari<sup>1</sup>, Cristen Willer<sup>1</sup>, Sarah Graham<sup>1</sup>, Ernst Mayerhofer<sup>1</sup>, Mary Haas<sup>1</sup>, Niek Verweij<sup>1</sup>, George Hindy<sup>1</sup>, Jonas Bovijn<sup>1</sup>, Tanim De<sup>1</sup>, Parsa Akbari<sup>1</sup>, Luanluan Sun<sup>1</sup>, Olukayode Sosina<sup>1</sup>, Arthur Gilly<sup>1</sup>, Peter Dornbos<sup>1</sup>, Juan Rodriguez-Flores<sup>1</sup>, Moeen Riaz<sup>1</sup>, Manav Kapoor<sup>1</sup>, Gannie Tzoneva<sup>1</sup>, Momodou W. Jallow<sup>1</sup>, Anna Alkelai<sup>1</sup>, Giovanni Coppola<sup>1</sup>, Ariane Ayer<sup>1</sup>, Veera Rajagopal<sup>1</sup>, Sahar Gelfman<sup>1</sup>, Vijay Kumar<sup>1</sup>, Jacqueline Otto<sup>1</sup>, Neelroop Parikshak<sup>1</sup>, Aysegul Guvenek<sup>1</sup>, Jose Bras<sup>1</sup>, Silvia Alvarez<sup>1</sup>, Jessie Brown<sup>1</sup>, Jing He<sup>1</sup>, Hossein Khiabani<sup>1</sup>, Joana Revez<sup>1</sup>, Kimberly Skead<sup>1</sup>, Valentina Zavala<sup>1</sup>, Jae Soon Sul<sup>1</sup>

### **Research Program Management & Strategic Initiatives**

Marcus B. Jones<sup>1</sup>, Esteban Chen<sup>1</sup>, Michelle G. LeBlanc<sup>1</sup>, Jason Mighty<sup>1</sup>, Jennifer Rico-Varela<sup>1</sup>, Nirupama Nishtala<sup>1</sup>, Nadia Rana<sup>1</sup>, Jaimee Hernandez<sup>1</sup>

### **Senior Partnerships & Business Operations**

Alison Fenney<sup>1</sup>, Randi Schwartz<sup>1</sup>, Jody Hankins<sup>1</sup>, Samuel Hart<sup>1</sup>

### **Business Operations & Administrative Coordinators**

Ann Perez-Beals<sup>1</sup>, Gina Solari<sup>1</sup>, Johannie Rivera-Picart<sup>1</sup>, Michelle Pagan<sup>1</sup>, Sunilbe Siceron<sup>1</sup>

<sup>1</sup>Regeneron Genetics Center, Tarrytown, NY, USA.

## **References**

- Cunningham, F., Allen, J. E., Allen, J., Alvarez-Jarreta, J., Amode, M. R., Armean, I. M., Austine-Orimoloye, O., Azov, A. G., Barnes, I., & Bennett, R. (2022). Ensembl 2022. *Nucleic acids research*, 50(D1), D988-D995.
- Liu, Y., Chen, S., Li, Z., Morrison, A. C., Boerwinkle, E., & Lin, X. (2019). ACAT: a fast and powerful p value combination method for rare-variant analysis in sequencing studies. *The American Journal of Human Genetics*, 104(3), 410-421.
- McLaren, W., Gil, L., Hunt, S. E., Riat, H. S., Ritchie, G. R., Thormann, A., Flicek, P., & Cunningham, F. (2016). The ensembl variant effect predictor. *Genome biology*, 17(1), 1-14.
